# Supplementary material for: Maternal Exercise Mediates Hepatic Metabolic Programming via Activation of AMPK-PGC1α Axis in the Offspring of Obese Mothers
Source: MDPI journal article supplement (doi:10.3390/cells10051247), 2021-05-19
Supplement: s1 [file s1]

# Maternal Exercise Mediates Hepatic Metabolic Programming via Activation of AMPK-PGC1 $\alpha$ Axis in the Offspring of Obese Mothers

Philipp Kasper <sup>1,†</sup>, Saida Breuer <sup>2,†</sup>, Thorben Hoffmann <sup>2</sup>, Christina Vohlen <sup>2</sup>, Ruth Janoschek <sup>2</sup>, Lisa Schmitz <sup>2</sup>, Sarah Appel <sup>2</sup>, Gregor Fink <sup>2</sup>, Christoph Hünseler <sup>2</sup>, Alexander Quaas <sup>3</sup>, Münevver Demir <sup>4</sup>, Sonja Lang <sup>1,5</sup>, Hans-Michael Steffen <sup>1</sup>, Anna Martin <sup>1</sup>, Christoph Schramm <sup>1</sup>, Martin Bürger <sup>1</sup>, Esther Mahabir <sup>6</sup>, Tobias Goesser <sup>1</sup>, Jörg Dötsch <sup>2</sup>, Eva Hucklenbruch-Rother <sup>2,†,\*</sup> and Inga Bae-Gartz <sup>2,†,\*</sup>

## 1. Supplementary Figure S1

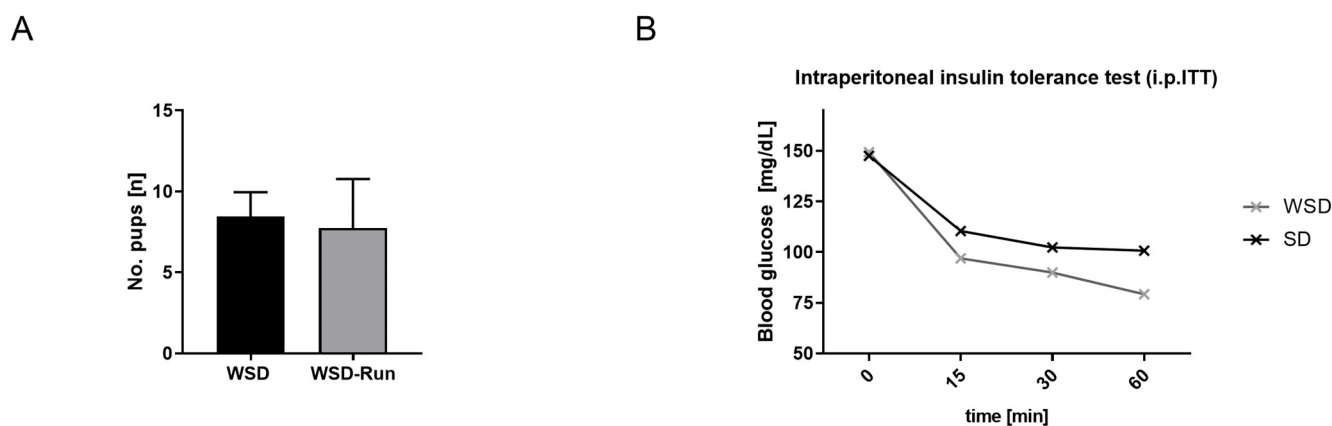

Figure S1. (A) Litter size at birth (Mean litter size WSD group: 8.4 pups/dam; mean litter size WSD-

## 2. Supplementary Figure S2–Animal Model

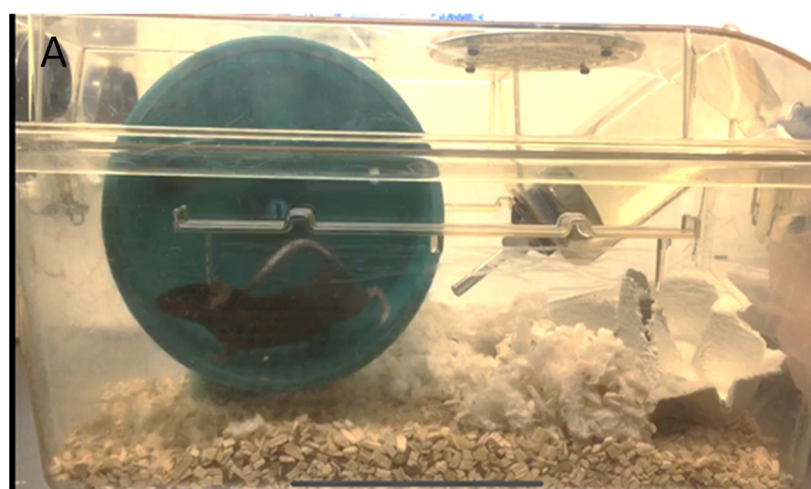

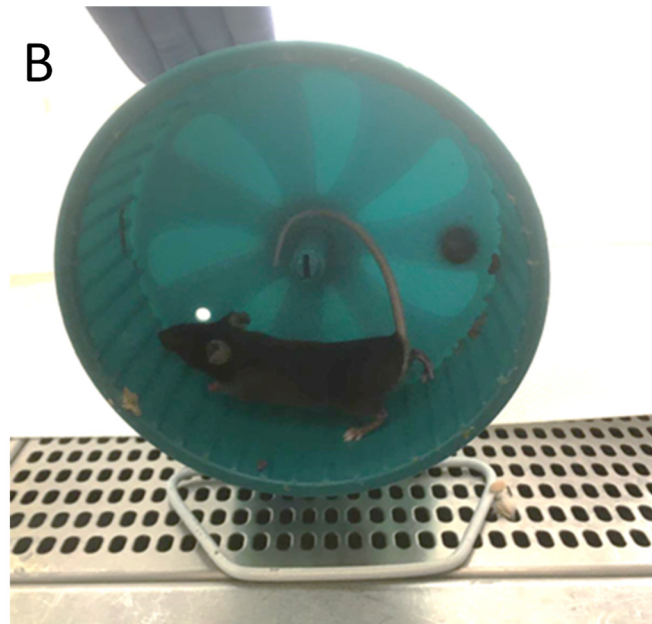

**Figure 2.** Illustration of the experimental setting and the running wheel provided to the mice for voluntary-wheel-running exercise. Representative image inside the cage (A) and for a better overview outside the cage (B).

Voluntary wheel running (VWR) was used to examine the mechanisms by which maternal exercise confers improvement on both dams and offspring metabolic health. As illustrated, female C57BL/6N mice were housed individually in cages equipped with a running wheel (WSD-Run group). The running wheel was equipped with a tachometer measuring distance (km), average speed (km/h) and time (h:m). Using this equipment an accurate recording of physical activity for each individual animal was possible. Control animals remained sedentary (WSD group).

### 3. Supplementary Table S1 (Primer List, Real Time RT-PCR)

**Table S1.** List of primers used for real-time RT-PCR.

| Gene                                                      | Primer             | Primer sequence 5'-3'      |
|-----------------------------------------------------------|--------------------|----------------------------|
| Acaca <sup>1</sup><br>(Acetyl-CoA carboxylase 1)          | for                | GAAGTCAGAGCCACGGCACA       |
|                                                           | rev                | GGCAATCTCAGTTCAAGCCAGTC    |
| Acacb <sup>1</sup><br>(Acetyl-CoA carboxylase 2)          | for                | CTACAAGACGGCGCAGGTCA       |
|                                                           | rev                | AGGCGCCAAACTTCAGCATC       |
| Acox1 <sup>1</sup><br>(Acyl-CoA Oxidase 1)                | for                | GAGCCTTTGGACCTTCACTTGG     |
|                                                           | rev                | CGCATAAGTGCCCGTGATCT       |
| Cpt1a <sup>1</sup><br>(Carnitine Palmitoyltransferase 1A) | for                | CATTACAAGGACATGGGCAAGTT    |
|                                                           | rev                | CCGTAGTGCAGGAGCGTACA       |
| Fasn <sup>1</sup><br>(Fatty acid synthase)                | for                | CCATGGAGCGTATATGTGAACAG    |
|                                                           | rev                | AATGCCCACGTCACCAATG        |
| Gapdh                                                     | for                | ATGTGTCCGTCGTGGATCTGA      |
|                                                           | rev                | TGCCTGCTCACCACCTTCT        |
| Gusb                                                      | Probe (FAM, TAMRA) | CCGCCTGGAGAAACCTGCCAAGTATG |
|                                                           | for                | CGCTGAGAGTAATCGGAAACAA     |
|                                                           | rev                | CGCAAAATAAAGGCCGAAGT       |
|                                                           | Probe (FAM, TAMRA) | ATCTTCACTCGCCAGAGACAGCCCA  |
| G6pc <sup>1</sup><br>(Glucose-6-phosphatase)              | for                | TGTCTGTGATTGCTGACCTG       |
|                                                           | rev                | GTAGAAGTGACCATAACATAG      |
| Il6<br>(Interleukin 6)                                    | for                | ACAAGTCGGAGGCTTAATTACACAT  |
|                                                           | rev                | AATCAGAATTGCCATTGCCCAA     |

|                                                                                         | Probe (FAM, TAMRA) | TCTTTTCTCATTTCACGATTTCACAGAGAA                         |
|-----------------------------------------------------------------------------------------|--------------------|--------------------------------------------------------|
| Il1b <sup>1</sup><br>(Interleukin 1 beta)                                               | for<br>rev         | TGACAGTGATGAGAATGACCTGTTC<br>GGACAGCCCAGGTCAAAGG       |
| Insr <sup>1</sup><br>(Insulin receptor)                                                 | for<br>rev         | GCAAACAGATGCCACTAATCCTT<br>GGGCTTCCACTTTAAGATAATCTGA   |
| Irs-1 <sup>1</sup><br>(Insulin Receptor Substrate 1)                                    | for<br>rev         | CCAGAGTCAAGCCTCACACA<br>CCCAACTCAACTCCACCACT           |
| Mcp-1<br>(Monocyte chemoattractant protein 1)                                           | for<br>rev         | GGCTCAGCCAGATGCAGTTAAC<br>CTTGGTGACAAAACTACAGCTTCTT    |
| Nfkb1 <sup>1</sup><br>(Nuclear Factor Kappa B Subunit 1)                                | for<br>rev         | CATCCCGGAGTCACGAAATC<br>GCACAATCTTTAGGGCCATTTT         |
| Nfkb2 <sup>1</sup><br>(Nuclear Factor Kappa B Subunit 2)                                | for<br>rev         | TCTAGCCACAGAGATGGAGGAGTT<br>AGGTCCGGGCATTACATTA        |
| Pck <sup>1</sup><br>(Phosphoenolpyruvate carboxykinase, Pepck)                          | for<br>rev         | CCACAGCTGCTGCAGAACAC<br>GAAGGGTCGCATGGCAAA             |
| Ppara<br>(Peroxisome Proliferator Activated Receptor $\alpha$ )                         | for<br>rev         | CCAGTACTGCCGTTTTTACAAGT<br>GCTTTTTTTCAGATCTTGGCATTCTT  |
| Pprag<br>(Peroxisome Proliferator Activated Receptor $\gamma$ )                         | for<br>rev         | CCCAATGGTTGCTGATTACAAA<br>GCCTGTTGTAGAGCTGGGTCTT       |
| Ppargc1a<br>(Peroxisome proliferator-activated receptor gamma coactivator 1- $\alpha$ ) | for<br>rev         | TCGAAAAAGAAGTCCCATACACAA<br>TTCCACACTTAAGGTTTCGCTCAATA |
| Srebp1c <sup>1</sup><br>(Sterol regulatory element-binding protein 1c)                  | for<br>rev         | CATCGACTACATCCGCTTCTTG<br>GTGATTGCTTTTGTGTGCACTTC      |
| Tnfa <sup>1</sup><br>(Tumor necrosis factor- $\alpha$ )                                 | for<br>rev         | AGGGATGAGAAGTTCCCAAATG<br>GCTTGTCACTCGAATTTTGAGAAG     |

<sup>1</sup>Genes were measured by the SYBR-Green method. No probe was needed. Abbreviations: FAM, 6-carboxyfluorescein; TAMRA, tetramethylrhodamine.

#### 4. Supplementary Table S2 (Antibody List, Immunoblots)

**Table S2.** Blots were probed with the following antibodies.

| Primary antibody                | Description                                                  | Purchased from                                     |
|---------------------------------|--------------------------------------------------------------|----------------------------------------------------|
| phospho-ACC (Ser79)             | Monoclonal rabbit anti-phosphorylated ACC, 1:1000            | Cell Signaling, Danvers, MA, USA; catalog no. 3661 |
| ACC                             | monoclonal rabbit anti-total ACC. 1:2000                     | Cell Signaling, Danvers, MA, USA; catalog no. 3662 |
| phospho-AMPK- $\alpha$ (Thr172) | Monoclonal rabbit anti-phosphorylated AMPK $\alpha$ , 1:1000 | Cell Signaling, Danvers, MA, USA; catalog no. 2535 |
| AMPK- $\alpha$                  | monoclonal rabbit anti-total AMPK $\alpha$ , 1:2000          | Cell Signaling, Danvers, MA, USA; catalog no. 2603 |
| phospho-AKT (Ser473)            | monoclonal rabbit anti-phosphorylated AKT; 1:1000            | Cell Signaling, Danvers, MA, USA; catalog no. 4058 |

|               |                                               |                                                       |
|---------------|-----------------------------------------------|-------------------------------------------------------|
| AKT           | monoclonal rabbit anti-total AKT, 1:2000      | Cell Signaling, Danvers, MA, USA; catalog no. 9272    |
| PGC1 $\alpha$ | monoclonal rabbit anti-PGC1 $\alpha$ , 1:2000 | Invitrogen, Carlsbad, CA, USA; catalog. no. PA5-38021 |

Secondary antibody:

Anti-rabbit IgG (horseradish peroxidase-linked; Cell Signaling Technology, Danvers, MA, USA catalog no. 7074) was used as secondary antibody.

Abbreviations: ACC, acetyl-CoA-carboxylase; AMPK $\alpha$ , AMP-activated protein kinase alpha subunit; PGC1 $\alpha$ , Peroxisome proliferator-activated receptor gamma coactivator 1-alpha, IgG immunoglobulin G.

## 5. Supplementary Table S3 (Experimental Diets)

**Table S3.** Information on crude nutrients and energy density of the experimental diets.

| SD                     |                               |      | WSD                                                                               |
|------------------------|-------------------------------|------|-----------------------------------------------------------------------------------|
| Name                   | complete feed for rats & mice |      | DIO – 45 kJ% fat (Lard)                                                           |
| Company                | Ssniff                        |      | Ssniff                                                                            |
| Order number           | V1534 - R/M-Maintenance       |      | E15744-344                                                                        |
| Additional information | complete feed for rats & mice |      | HF diet for rodents with lard (& soybean oil) correspond to D12451 Research Diets |
| Metab. Energy          | kcal/kg                       | 3225 | 4615                                                                              |
| Metab. Energy          | MJ/kg                         | 13.5 | 19.30                                                                             |
| Gross Energy           | MJ/kg                         | 16.2 | 22.50                                                                             |
| Fat                    | kJ%                           | 9    | 45.00                                                                             |
| Protein                | kJ%                           | 24   | 20.00                                                                             |
| Carbohydrates          | kJ%                           | 67   | 35.00                                                                             |
| Sugar                  | kJ%                           | 8.8  | 19.1                                                                              |
| Crude Fat              | g/kg                          | 33   | 236                                                                               |
| Crude Protein          | g/kg                          | 190  | 220                                                                               |
| Crude Fibre            | g/kg                          | 50   | 57                                                                                |
| Crude Ash              | g/kg                          | 64   | 53                                                                                |
| N free extracts        | g/kg                          | 546  | 400                                                                               |
| <b>Sugar</b>           |                               |      |                                                                                   |
| Sucrose                | g/kg                          | -    | 211.0                                                                             |
| Monosaccharides        | g/kg                          | 54.0 | -                                                                                 |
| Dissacharides          | g/kg                          |      | -                                                                                 |
| Sugar (total)          | g/kg                          | 54   | 211.0                                                                             |
| <b>Carbohydrates</b>   |                               |      |                                                                                   |
| Dextrin                | g/kg                          | -    | 108.0                                                                             |
| Polysaccharides        | g/kg                          | 359  | -                                                                                 |
| Starch                 | g/kg                          | -    | 68                                                                                |
| Carbohydrates (total)  | g/kg                          | 413  | 387                                                                               |
| Cellulose powder       | g/kg                          | -    | 57                                                                                |
| Cholesterol            | mg/kg                         | -    | -                                                                                 |

|                             |        |         |        |        |
|-----------------------------|--------|---------|--------|--------|
| <b>Fat Sources</b>          |        |         |        |        |
| soybean oil                 | %      | n/a     |        | 2.8    |
| butter fat                  | %      | n/a     |        | -      |
| corn oil                    | %      | n/a     |        | -      |
| pork lard                   | %      | n/a     |        | 20.8   |
| palm oil                    | %      | n/a     |        | -      |
| <b>Fatty Acids</b>          |        |         |        |        |
| butanoic acid               | C 4:0  | mg/kg   | -      | -      |
| caproic acid                | C 6:0  | mg/kg   | -      | -      |
| caprylic acid               | C 8:0  | mg/kg   | -      | -      |
| capric acid                 | C-10:0 | mg/kg   | -      | -      |
| lauric acid                 | C-12:0 | mg/kg   | -      | 500    |
| myristic acid               | C-14:0 | mg/kg   | 0.01   | 2900   |
| palmitic acid               | C-16:0 | mg/kg   | 0.45   | 53,300 |
| margaric acid               | C-17:0 | mg/kg   | -      | -      |
| stearic acid                | C-18:0 | mg/kg   | 0.09   | 29,200 |
| arachidic acid              | C-20:0 | mg/kg   | 0.01   | 70     |
| palmitoleic acid            | C-16:1 | mg/kg   | 0.01   | 6200   |
| oleic acid                  | C-18:1 | mg/kg   | 0.62   | 94,200 |
| linoleic acid               | C-18:2 | mg/kg   | 1.66   | 34,600 |
| alpha-linolenic acid        | C-18:3 | mg/kg   | 0.23   | 3700   |
| eicosanoic acid             | C-20:1 | mg/kg   | -      | -      |
| eicosadienoic acid          | C-20:2 | mg/kg   | -      | -      |
| arachidonic acid            | C-20:4 | mg/kg   | -      | -      |
| <b>Minerals</b>             |        |         |        |        |
| Calcium                     |        | g/kg    | 10.00  | 92.00  |
| Phosphorus                  |        | g/kg    | 7.00   | 64.00  |
| Magnesium                   |        | g/kg    | 2.20   | 23.00  |
| Sodium                      |        | g/kg    | 2.40   | 20.00  |
| Potassium                   |        | g/kg    | 9.10   | 97.00  |
| Sulfur                      |        | g/kg    | n/a    | n/a    |
| Chlorine                    |        | g/kg    | n/a    | n/a    |
| Ca/P                        |        | %       | 1.43:1 | 1.44:1 |
| <b>Trace Elements</b>       |        |         |        |        |
| Iron                        |        | mg/kg   | 189    | 168    |
| Manganese                   |        | mg/kg   | 68     | 95     |
| Zinc                        |        | mg/kg   | 91     | 65     |
| Copper                      |        | mg/kg   | 15     | 13     |
| Iodine                      |        | mg/kg   | 2.1    | 1.2    |
| Molybdenum                  |        | mg/kg   | -      | n/a    |
| Fluorine                    |        | mg/kg   | -      | n/a    |
| Selenium                    |        | mg/kg   | 0.3    | 0.2    |
| Cobalt                      |        | mg/kg   | -      | n/a    |
| Mineral & trace element mix | %      | n/a     |        | 6      |
| <b>Vitamins</b>             |        |         |        |        |
| Vitamin A                   |        | I.E./kg | 15,000 | 15,000 |
| Vitamin D3                  |        | I.E./kg | 1100   | 1500   |
| Vitamin E                   |        | mg/kg   | 110    | 150    |
| Menachinone                 |        | mg/kg   | 7      | 20     |
| Thiamin                     |        | mg/kg   | 18     | 25     |

|                                      |       |           |        |
|--------------------------------------|-------|-----------|--------|
| Riboflavin                           | mg/kg | 22        | 16     |
| Vitamin B6                           | mg/kg | 21        | 16     |
| Vitamin B12                          | mg/kg | 0,1       | 30     |
| Nicotinic acid                       | mg/kg | 115       | 47     |
| Pantothenic acid                     | mg/kg | 40        | 55     |
| Folate                               | mg/kg | 7         | 16     |
| Biotin                               | mg/kg | 0.51      | 300    |
| Choline                              | mg/kg | 1370      | 920    |
| Vitamin C                            | mg/kg | not added | n/a    |
| Choline chloride                     | mg/kg | not added | 0,2    |
| Vitamin premix                       | %     | not added | 1      |
|                                      |       |           |        |
| <b>Amino acids</b>                   |       |           |        |
| Lysine                               | mg/kg | 10,000    | 18,300 |
| Methionine                           | mg/kg | 3300      | 7800   |
| Cystine                              | mg/kg | 3500      | 3900   |
| Met+Cys                              | mg/kg | 6800      | 11,800 |
| Threonine                            | mg/kg | 7100      | 9700   |
| Tryptophan                           | mg/kg | 2500      | 2900   |
| Arginine                             | mg/kg | 11,900    | 8600   |
| Histidine                            | mg/kg | 4400      | 6700   |
| Valine                               | mg/kg | 9000      | 15,400 |
| Isoleucine                           | mg/kg | 7900      | 12,500 |
| Leucine                              | mg/kg | 13,900    | 21,900 |
| Phenylalanine                        | mg/kg | 8800      | 11,400 |
| Phe+Tyr                              | mg/kg | 14,900    | 23,100 |
| Glycine                              | mg/kg | 8800      | 4700   |
| Glutamic acid                        | mg/kg | 41,000    | 49,700 |
| Aspartic acid                        | mg/kg | 17,900    | 16,400 |
| Proline                              | mg/kg | 12,900    | 25,300 |
| Serine                               | mg/kg | 9900      | 13,200 |
| Alanine                              | mg/kg | 8200      | 6600   |
|                                      |       |           |        |
| <b>Antioxidant</b>                   |       |           |        |
| Butylated hydroxytolu-<br>ene = E321 | %     | n/a       | n/a    |
